# Supplementary material
Source: PubMed Central journal article supplement (PMC7759453)
Supplement: JZUSB21-0940-ESM.pdf [file JZUSB21-0940-ESM.pdf]

**Table S1 Search strategy of the recurrence cases with COVID-19**

|                | Searches                                                                                                                                                                                                                                                                                                                                                                                                                                                                                                                                                                 | Results |
|----------------|--------------------------------------------------------------------------------------------------------------------------------------------------------------------------------------------------------------------------------------------------------------------------------------------------------------------------------------------------------------------------------------------------------------------------------------------------------------------------------------------------------------------------------------------------------------------------|---------|
| Pubmed         | ((((((((((severe acute respiratory syndrome coronavirus 2[Supplementary Concept]) OR COVID-19[Supplementary Concept]) OR COVID-19[Text Word]) OR SARS-CoV-2[Text Word]) OR coronavirus disease 2019[Text Word]) OR novel coronavirus[Text Word]) OR coronavirus[Text Word]))) AND (((((((recurren*[Text Word]) OR reinfect*[Text Word]) OR reactivat*[Text Word]) OR re-positive[Text Word]) OR return*[Text Word]) OR repeat*[Text Word]) OR re-detect*[Text Word]) OR readmit*[Text Word]) OR residual infection[Text Word]) Filters: Publication date from 2020/01/01 | 361     |
| Web of Science | ((severe acute respiratory syndrome coronavirus 2 OR COVID-19 OR SARS-CoV-2 OR coronavirus disease 2019 OR novel coronavirus)) AND(recurren* OR reinfect* OR reactivat* OR re-positive OR return* OR repeat* OR re-detect* OR readmit* OR residual infection))                                                                                                                                                                                                                                                                                                           | 292     |
| MedRxiv        | (COVID-19 OR 2019-nCoV OR SARS-CoV-2 OR coronavirus) AND (recurrence OR reinfection OR reactivation OR re-positive OR repeat)                                                                                                                                                                                                                                                                                                                                                                                                                                            | 182     |
| BioRxiv        | (COVID-19 OR 2019-nCoV OR SARS-CoV-2 OR coronavirus) AND (recurrence OR reinfection OR reactivation OR re-positive OR repeat)                                                                                                                                                                                                                                                                                                                                                                                                                                            | 92      |
| CNKI           | (COVID-19 OR 2019-nCoV OR SARS-CoV-2 OR coronavirus) AND (recurrence OR reinfection OR reactivation OR re-positive OR repeat)                                                                                                                                                                                                                                                                                                                                                                                                                                            | 34      |
| SinoMed        | (COVID-19 OR 2019-nCoV OR SARS-CoV-2 OR coronavirus) AND (recurrence OR reinfection OR reactivation OR re-positive OR repeat)                                                                                                                                                                                                                                                                                                                                                                                                                                            | 8       |
| Wangfang       | (COVID-19 OR 2019-nCoV OR SARS-CoV-2 OR coronavirus) AND (recurrence OR reinfection OR reactivation OR re-positive OR repeat)                                                                                                                                                                                                                                                                                                                                                                                                                                            | 30      |
| VP             | (COVID-19 OR 2019-nCoV OR SARS-CoV-2 OR coronavirus) AND (recurrence OR reinfection OR reactivation OR re-positive OR repeat)                                                                                                                                                                                                                                                                                                                                                                                                                                            | 0       |

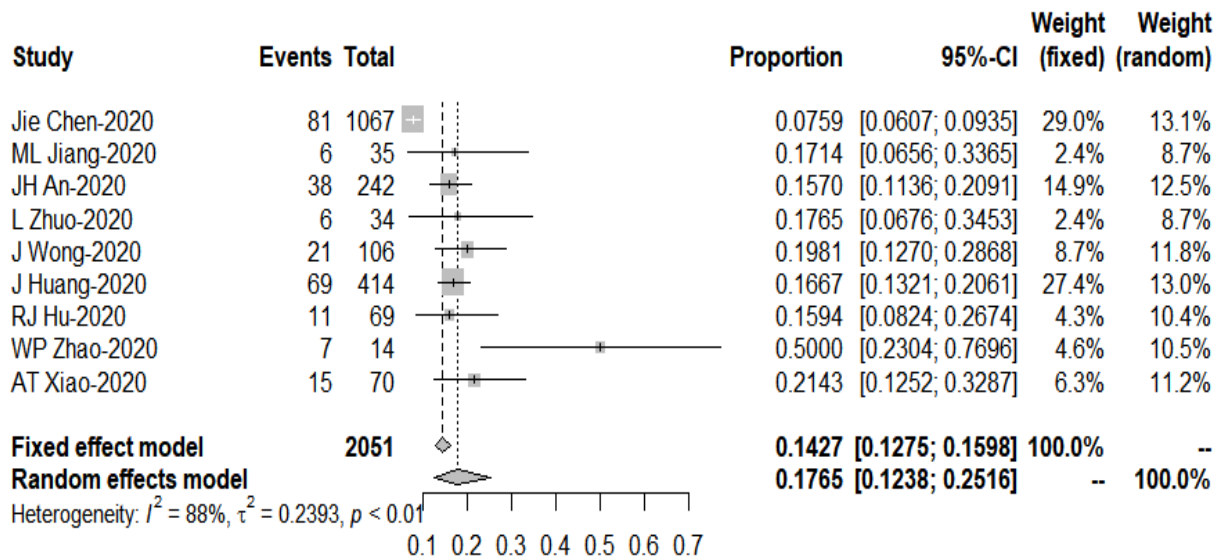

**Fig. S1 Forest plots of meta-analysis on the proportion of the asymptomatic individuals among the COVID-19 infections**

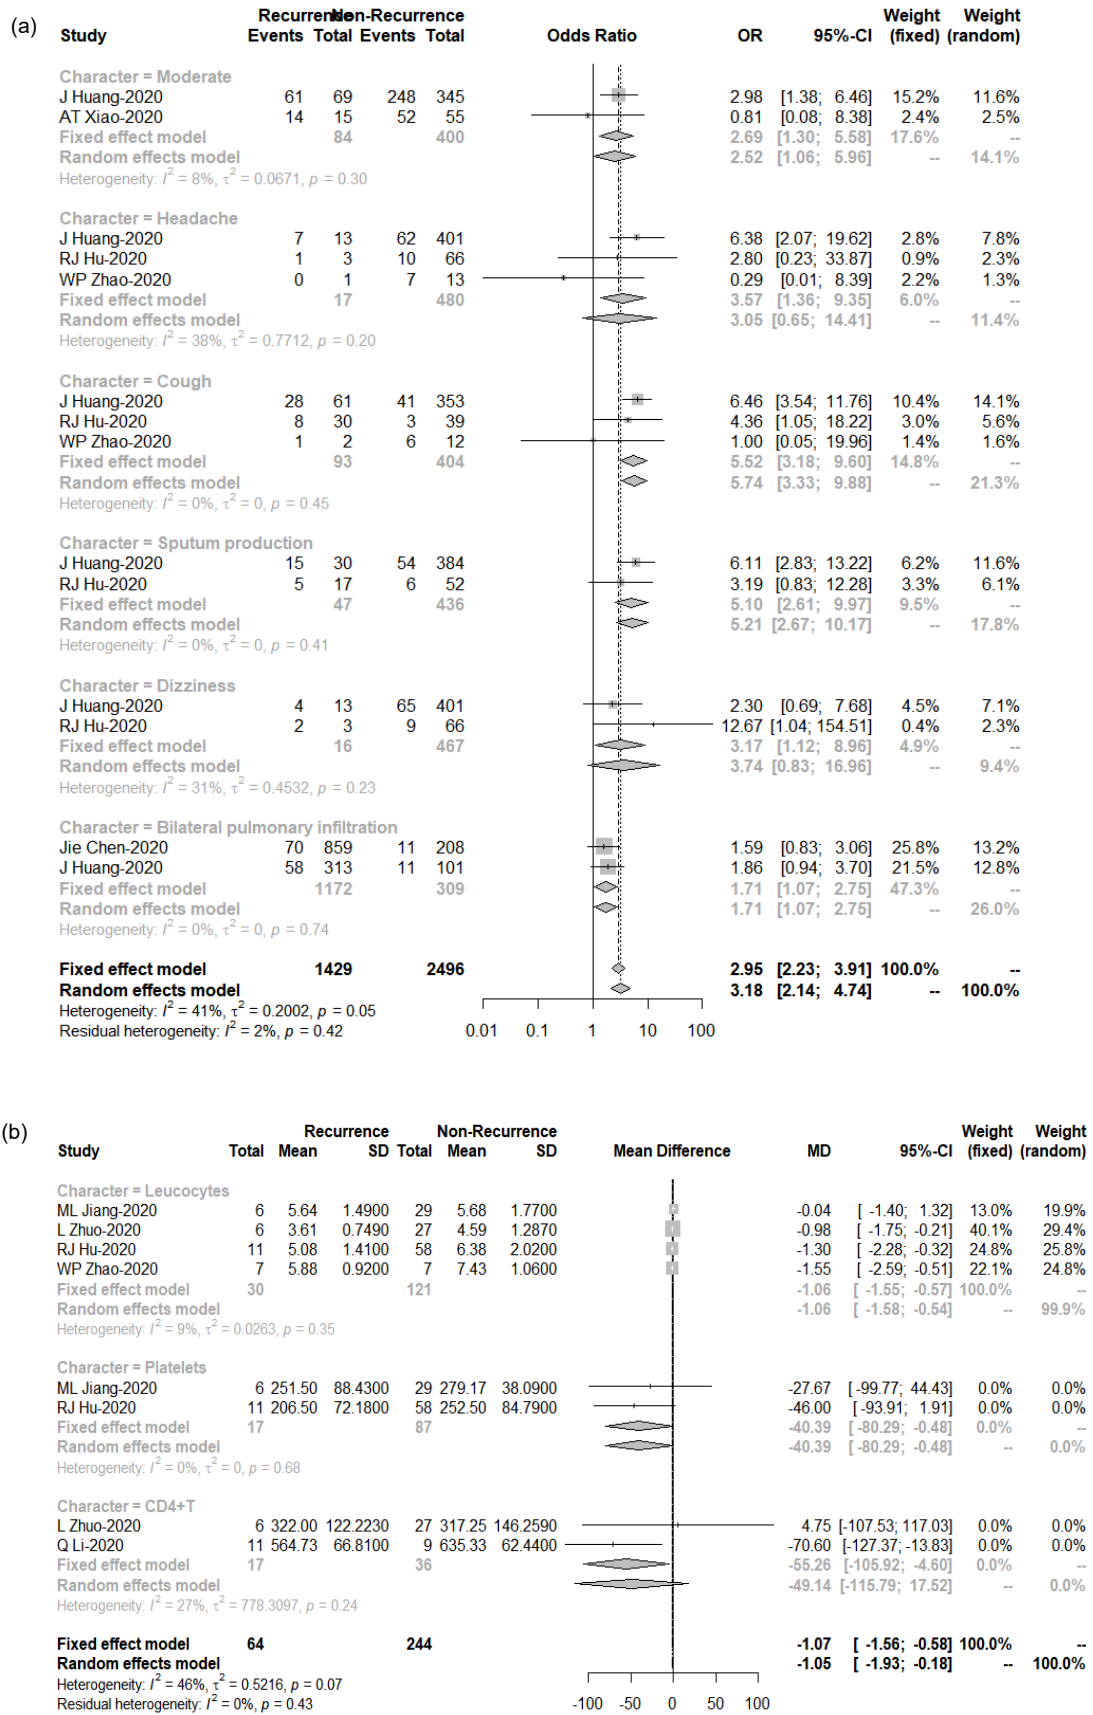

Fig. S2 Forest plots of meta-analysis on clinical characteristics and laboratory findings of the recurrence cases among the COVID-19 infections

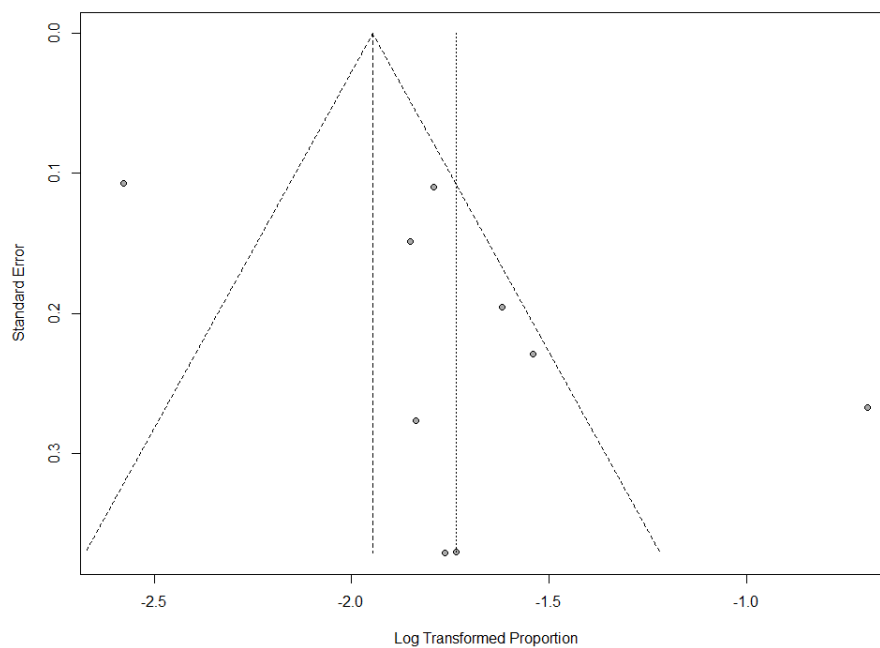

**Fig. S3** Funnel plot assessing publication bias in studies reporting proportion of recurrence cases among the COVID-19 patients
